# Supplementary material for: Prolactin mediates behavioural rejection responses to avian brood parasitism
Source: Oxford University Press journal article supplement (doi:10.1242/jeb.240101), 2021-10-04
Supplement: jeb240101supp.pdf [file jeb240101supp.pdf]

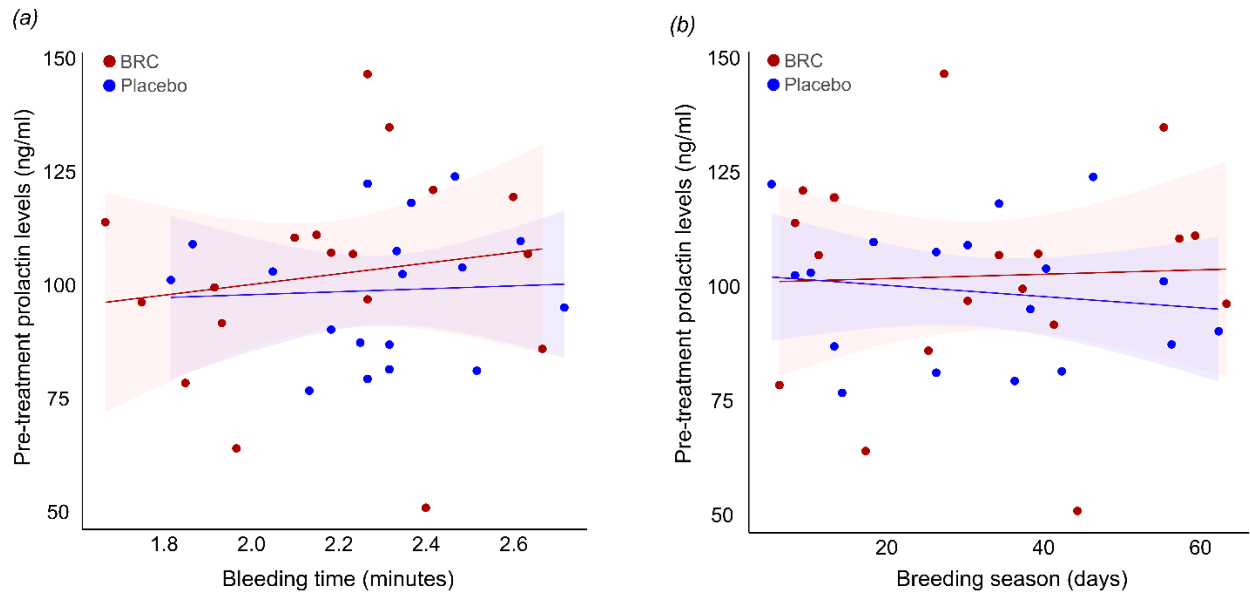

**Fig. S1.** (a) Relationships between bleeding time and pre-treatment prolactin levels. Bleeding time did not affect pre-treatment prolactin levels in BRC (estimate  $\pm$  se =  $11.78 \pm 19.29$ ;  $t = 0.611$ ;  $p = 0.55$ ) and placebo-implanted females (estimate  $\pm$  se =  $3.27 \pm 15.98$ ;  $t = 0.21$ ;  $p = 0.84$ ). (b) Variations in pre-treatment prolactin levels through the breeding season. There was no seasonal variation in prolactin levels before implantation for both BRC (estimate  $\pm$  se =  $0.05 \pm 0.31$ ;  $t = 0.155$ ;  $p = 0.88$ ) and placebo-implanted females (estimate  $\pm$  se =  $-0.12 \pm 0.21$ ;  $t = -0.58$ ;  $p = 0.57$ ).

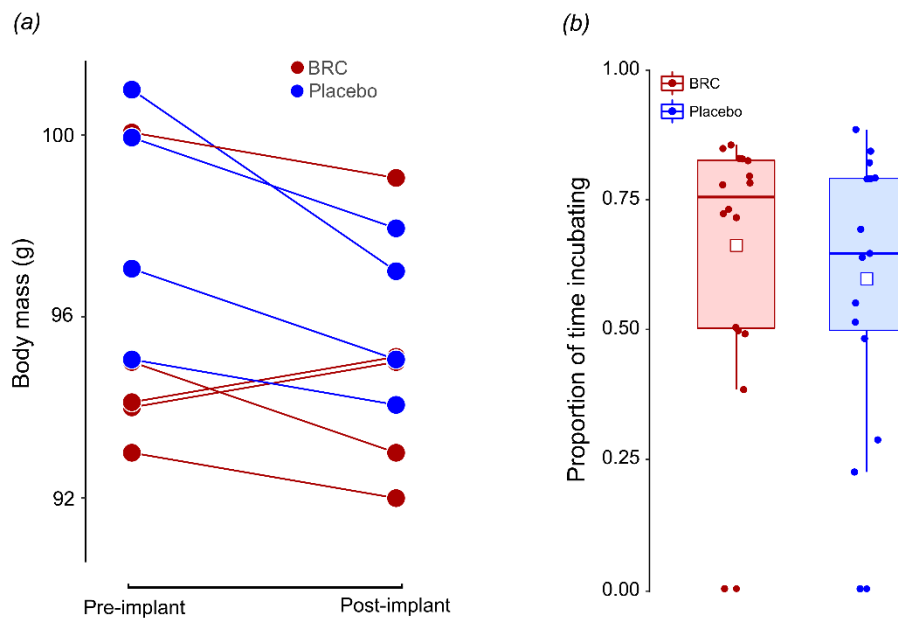

**Fig. S2.** (a) Changes in body mass 6 days after experimental manipulation. (b) Proportion of time spent by female blackbirds incubating their eggs. Box plots show the median (continuous line), the mean (white box), and 25th and 75th percentiles (colored boxes), with whiskers denoting the 5th and 95th percentiles.
